# Supplementary material
Source: ML conference proceedings conference paper supplement (https://openaccess.thecvf.com/content/CVPR2023/html/Tong_Seeing_Through_the_CVPR_2023_paper.html)
Supplement: Supplementary file 1 [file Tong_Seeing_Through_the_CVPR_2023_supplemental.pdf]

# Seeing Through the Glass: Neural 3D Reconstruction of Object Inside a Transparent Container

## Supplementary Material

Jinguang Tong<sup>1,2</sup>, Sundaram Muthu<sup>2</sup>, Fahira Afzal Maken<sup>2</sup>, Chuong Nguyen<sup>1,2</sup>, Hongdong Li<sup>1</sup>

<sup>1</sup>The Australian National University    <sup>2</sup>Data61, CSIRO

{jinguang.tong, chuong.nguyen, hongdong.li}@anu.edu.au

{sundaram.muthu, fahira.afzalmaken, chuong.nguyen}@data61.csiro.au

### 1. Details of dataset

We summarize our proposed dataset in Tab. 1. Some examples of our proposed dataset are shown in Fig. 5 and Fig. 6.

| Dataset | $N_{obj}$ | $N_{view}$ | Resolution         | Mask   | Camera pose | GT model |
|---------|-----------|------------|--------------------|--------|-------------|----------|
| w/box   | 13        | 60         | $800 \times 800$   | box    | GT          | True     |
| w/o box | 13        | 60         | $800 \times 800$   | object | GT          | True     |
| real    | 10        | 60         | $1728 \times 1152$ | box    | estimated   | False    |

Table 1. Summary of the proposed dataset.

#### 1.1. Synthetic dataset

Our synthetic dataset consists of 13 objects with various appearances and geometries, we list the link and license of each item in Tab. 3. The material of the transparent box is set to be a glass-like material with Principled BSDF<sup>1</sup> whose main parameters are shown in Tab. 2 and the background irradiance is set as  $C^{out} = [0.8, 0.8, 0.8]$  across all the objects. While rendering, we render two images **w/ box** and **w/o box** separately by changing the visibility of the transparent box at each viewport. For the image mask used for training, we render the mask of the transparent box for w/ box dataset and the mask of the object for w/o box dataset. Overall, the two subsets share almost the same configurations except for the transparent box.

| Parameter | Specular | Roughness | Sheen Tint | IOR  | Transmission |
|-----------|----------|-----------|------------|------|--------------|
| Value     | 0.5      | 0.05      | 0.5        | 1.45 | 1.0          |

Table 2. Main parameters of the transparent material.

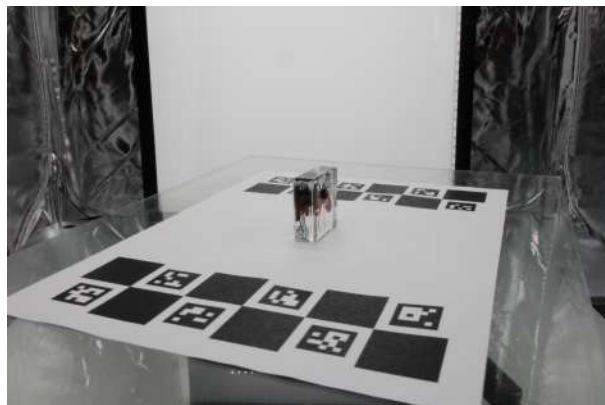

(a) Capture set-up.

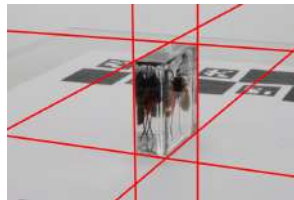

(b) Edges.

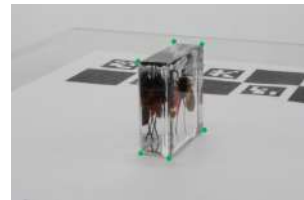

(c) Intersections.

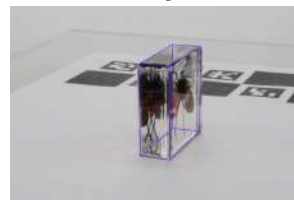

(d) Box geometry.

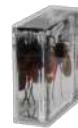

(e) Cropped image.

Figure 1. Process of real dataset calibration. (a) Data capture equipment. (b) Labeled edges of the box. (c) Intersections of the edges. (d) Calibrated geometry of the box. (e) Cropped image and box mask.

| Item      | License             | URL                                                                                                                                                                                                                                 |
|-----------|---------------------|-------------------------------------------------------------------------------------------------------------------------------------------------------------------------------------------------------------------------------------|
| beetle    | CC BY 4.0           | <a href="https://sketchfab.com/3d-models/eastern-hercules-beetle-a6f2a6fe7a3c4d19831f1bd79d664dcc">https://sketchfab.com/3d-models/eastern-hercules-beetle-a6f2a6fe7a3c4d19831f1bd79d664dcc</a>                                     |
| box       | CC BY 4.0           | <a href="https://sketchfab.com/3d-models/tollkiste-00fa12d17fe04dc39e9275164f5339c1">https://sketchfab.com/3d-models/tollkiste-00fa12d17fe04dc39e9275164f5339c1</a>                                                                 |
| butterfly | CC BY 4.0           | <a href="https://sketchfab.com/3d-models/common-lime-butterfly-smoothie-3d-078da6e1f86c4d2ca874e3f4381becb8">https://sketchfab.com/3d-models/common-lime-butterfly-smoothie-3d-078da6e1f86c4d2ca874e3f4381becb8</a>                 |
| coral     | CC BY-NC-SA 4.0     | <a href="https://sketchfab.com/3d-models/pocillopora-eydouxii-b2a7aef9f4814de09d42546c1a974cd0">https://sketchfab.com/3d-models/pocillopora-eydouxii-b2a7aef9f4814de09d42546c1a974cd0</a>                                           |
| coral2    | CC BY 4.0           | <a href="https://sketchfab.com/3d-models/pocillopora-meandrina-3bacf518167b46d78fef48ef9e0b7019">https://sketchfab.com/3d-models/pocillopora-meandrina-3bacf518167b46d78fef48ef9e0b7019</a>                                         |
| dinosaur  | CC BY 4.0           | <a href="https://sketchfab.com/3d-models/squelette-entier-de-felin-espece-inconnue-9b7ae513a2294711a9e083de1a4dcae5">https://sketchfab.com/3d-models/squelette-entier-de-felin-espece-inconnue-9b7ae513a2294711a9e083de1a4dcae5</a> |
| goku      | CC BY 4.0           | <a href="https://sketchfab.com/3d-models/goku-3d-scan-dragon-ball-3db326f4b41f4a00bbd116fad7f4d09e">https://sketchfab.com/3d-models/goku-3d-scan-dragon-ball-3db326f4b41f4a00bbd116fad7f4d09e</a>                                   |
| insect    | CC BY 4.0           | <a href="https://sketchfab.com/3d-models/cicindela-campestris-b13a625c2e3b4b6aa26a27711a0cac39">https://sketchfab.com/3d-models/cicindela-campestris-b13a625c2e3b4b6aa26a27711a0cac39</a>                                           |
| insect2   | CC BY 4.0           | <a href="https://sketchfab.com/3d-models/prosopocoilus-savageii-b04ad901d4344ccf8ec6893a6b36c27c">https://sketchfab.com/3d-models/prosopocoilus-savageii-b04ad901d4344ccf8ec6893a6b36c27c</a>                                       |
| lobster   | CC0 1.0             | <a href="https://sketchfab.com/3d-models/panulirus-longipes-d7cc2b585ad943ef81274e014e6f745b">https://sketchfab.com/3d-models/panulirus-longipes-d7cc2b585ad943ef81274e014e6f745b</a>                                               |
| shiba     | CC BY 4.0           | <a href="https://sketchfab.com/3d-models/free-toon-shiba-inu-3d-model-ae0a62c3d588496fa9d5e516fcb6786c">https://sketchfab.com/3d-models/free-toon-shiba-inu-3d-model-ae0a62c3d588496fa9d5e516fcb6786c</a>                           |
| statuette | TurboSquid standard | <a href="https://www.turbosquid.com/3d-models/3d-statuettes-sheep-barrel-model-1335035">https://www.turbosquid.com/3d-models/3d-statuettes-sheep-barrel-model-1335035</a>                                                           |
| vase      | CC BY 4.0           | <a href="https://sketchfab.com/3d-models/vase-951156fb0db74176af08501b5db4b5acd">https://sketchfab.com/3d-models/vase-951156fb0db74176af08501b5db4b5acd</a>                                                                         |

Table 3. Dataset source and license information.

## 1.2. Real dataset

The real dataset is captured with 10 insect specimens. As the set-up shown in Fig. 1a, the insect specimen is roughly placed at the center of a printed Charuco board [1]. We take photos of the specimen at different pitch angles while the board rotates uniformly on a display stand. Camera intrinsics and extrinsics are then calibrated with the Charuco board. As for the pose of the transparent box, we calibrate it manually, as shown in Fig. 1b-e. Firstly, we pick out the image with the lowest re-projection error during calibration and manually label the edges of the transparent box. Then, we calculate the 2D coordinates of the intersections of these lines. With known camera pose, the 2D coordinates can be lifted up to 3D by ray-plane intersecting. Finally, under the assumption of a cuboid-shaped box, we get the 3D geometry of the box as well as the relative pose between the box and the calibration board. The origin of the world coordinate system is transferred to the center of the box with the axis aligned and we further scale the poses so that the box lies in a unit sphere. Fig. 1d shows that our calibration result aligns with the box well. After calibration, we back-project the geometry of the box to each image to get the mask of the transparent box and center-crop the image to remove redundant boundaries.

## 2. Additional Experimental Details

### 2.1. Additional Implementation Details

**Scene parameters.** Our scene is assumed to be in the air. In order to do ray tracing, we set the Index of Refraction (IoR) of different mediums as  $\lambda_{air} = 1.00029$ ,  $\lambda_{syn} = 1.45$  and  $\lambda_{real} = 1.5$ , respectively.

**Post process** As mentioned in Sec. 4.3 in the main paper, we post-process the output mesh from w/ box dataset automatically. To be specific, we divide the mesh into several connected clusters and only retrain the biggest cluster with the most vertices. An example of post-processing is shown in Fig. 2. Since we are comparing with the results from w/o box dataset, it’s a reasonable process that can exclude the influence of boundary effects and allow us to evaluate the quality of object reconstruction better.

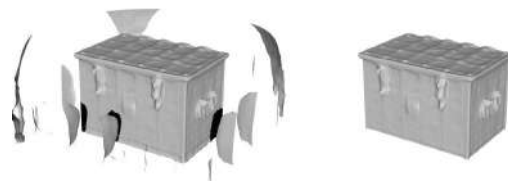

(a) Before process.

(b) After process.

Figure 2. Example of mesh post-processing. We only remove the trivial facets without any further modification.

<sup>1</sup>[https://docs.blender.org/manual/en/2.93/render/shader\\_nodes/shader/principled.html](https://docs.blender.org/manual/en/2.93/render/shader_nodes/shader/principled.html)

## 2.2. Baselines

**COLMAP** [4] We use the officially provided command line interface (CLI) of COLMAP. For synthetic dataset, we run COLMAP with ground truth pose and for real dataset, we use the calibrated camera pose. We run following CLI commands <sup>2</sup> to get a dense point cloud: (1)*feature\_extractor*, (2)*exhaustive\_matcher*, (3)*point\_triangler*, (4)*patch\_match\_stereo* and (5)*stereo\_fusion*. With the dense point cloud, we use the screened Poisson Surface Reconstruction (sPSR) [2] to generate the corresponding mesh.

**IDR** [6] We run IDR with the official code release <sup>3</sup>. We train IDR with our w/ box dataset using the same configuration as the original paper.

**NeuS** We use the official code release <sup>4</sup> of NeuS. For a fair comparison with our method, we also replace the activation function in NeuS with SIREN [5] and train NeuS with a larger batch size of 1024 for 200k iterations. We train NeuS with an image mask as the better performance shown in the paper.

## 2.3. Additional ablation study

In this section, we show some extended experiments of the ablation study in the main paper.

**Influence of transmittance loss.** We further analyze the influence of transmittance loss as an extend to the main paper. In Fig. 3, we visualize the evaluation metrics Chamfer- $L_1$  and the number of failure cases w.r.t. the weight of transmittance loss. From the results, we know that the transmittance loss can boost the performance of ReNeuS by reducing the failure cases from 2 to 0. Further, we adopt the weight of transmittance loss  $\lambda_1 = 0.1$  as a good measure of the dataset sparsity.

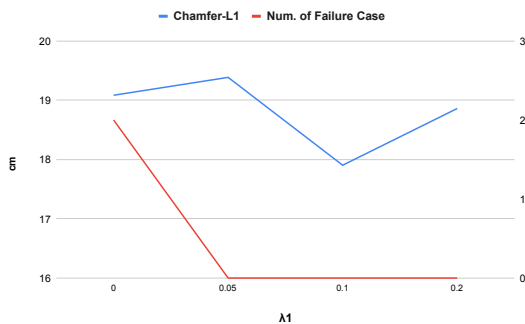

Figure 3. We show the influence of transmittance loss. Results show that the loss can promote the effectiveness of ReNeuS and we find  $\lambda_1 = 0.1$  to be a balance between sparsity and reconstruction quality on the proposed dataset.

<sup>2</sup><https://colmap.github.io/cli.html>

<sup>3</sup><https://github.com/lioryariv/idr>

<sup>4</sup><https://github.com/Totoro97/NeuS>

**Influence of ray tracing depth.** We evaluate the per-

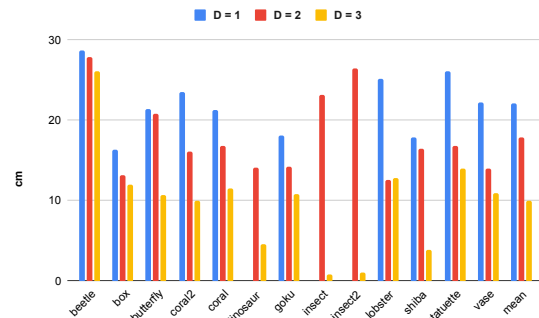

Figure 4. We evaluate the performance of ReNeuS at different tracing depth. Our method generally performs better with deeper ray tracing depth showing that the proposed hybrid rendering strategy models the scene well.

formance of ReNeuS w.r.t. the recursive depth  $D_{re}$  of ray tracing in Fig. 4. We alternate the depth from 1~3, among which we adopt the naive solution NeuS<sup>+</sup> in the main paper as  $D_{re} = 1$ . Note that for  $D_{re} = 3$ , we have to half the training batch size due to memory limitation and double total iterations correspondingly. We don’t trace “deeper” because the contribution of those rays can be quite limited due to light attenuation [?] and absorption [3]. The results show the reconstruction quality is consistently promoted with deeper ray tracing which indicates our hybrid rendering strategy fit the complex scene well.

## 2.4. Additional qualitative comparison

In this section, we show additional qualitative results on both datasets. Figure 7 shows the comparison with baseline methods on synthetic dataset. Even working with w/ box dataset and no object mask, our method produces comparable results with IDR which works on w/o box dataset and with an object mask. In Fig. 8, we demonstrate reconstruction results on real dataset. We find that our ReNeuS is the only one which works properly on such challenging scenes.

## References

- [1] S. Garrido-Jurado, R. Muñoz-Salinas, F. J. Madrid-Cuevas, and M. J. Marín-Jiménez. Automatic generation and detection of highly reliable fiducial markers under occlusion. *Pattern Recognition*, 47(6):2280–2292, 2014. 2
- [2] Michael Kazhdan and Hugues Hoppe. Screened poisson surface reconstruction. *ACM TOG*, 32(3):1–13, 2013. 3
- [3] N. Max. Optical models for direct volume rendering. *IEEE TVCG*, 1(2):99–108, 1995. 3
- [4] Johannes L. Schonberger and Jan-Michael Frahm. Structure-From-Motion Revisited. In *CVPR*, pages 4104–4113, 2016. 3
- [5] Vincent Sitzmann, Julien Martel, Alexander Bergman, David Lindell, and Gordon Wetzstein. Implicit Neural Representa-

tions with Periodic Activation Functions. In *NeurIPS*, volume 33, pages 7462–7473, 2020. [3](#)

- [6] Lior Yariv, Yoni Kasten, Dror Moran, Meirav Galun, Matan Atzmon, Basri Ronen, and Yaron Lipman. Multiview neural surface reconstruction by disentangling geometry and appearance. In *NeurIPS*, volume 33, pages 2492–2502, 2020. [3](#)

|           | w/box                                                                               | w/o box                                                                             | w/box                                                                               | w/o box                                                                             | w/box                                                                                 | w/o box                                                                               |
|-----------|-------------------------------------------------------------------------------------|-------------------------------------------------------------------------------------|-------------------------------------------------------------------------------------|-------------------------------------------------------------------------------------|---------------------------------------------------------------------------------------|---------------------------------------------------------------------------------------|
| beetle    |    |    |    |    |    |    |
| box       |    |    |    |    |    |    |
| butterfly |    |    |    |    |    |    |
| coral     |   |  |   |  |   |  |
| coral2    |  |  |  |  |  |  |
| dinosaur  |  |  |  |  |  |  |
| goku      |  |  |  |  |  |  |

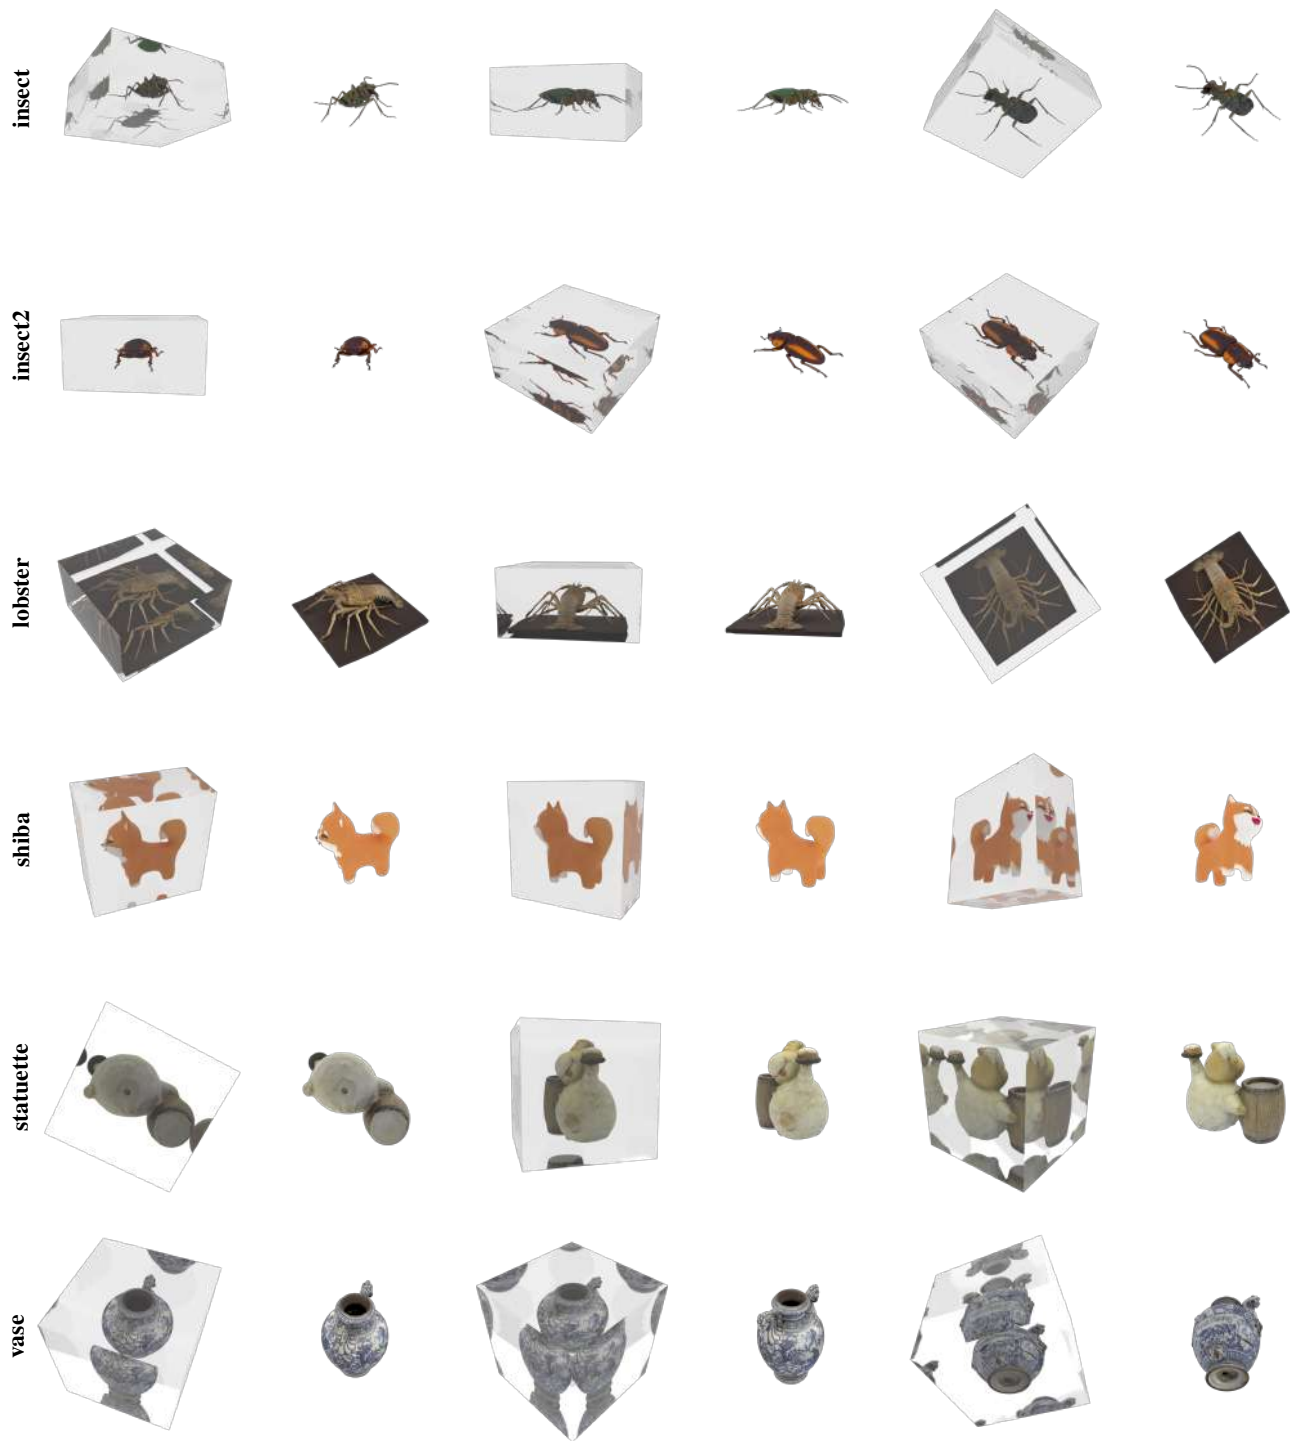

Figure 5. Examples of synthetic dataset.

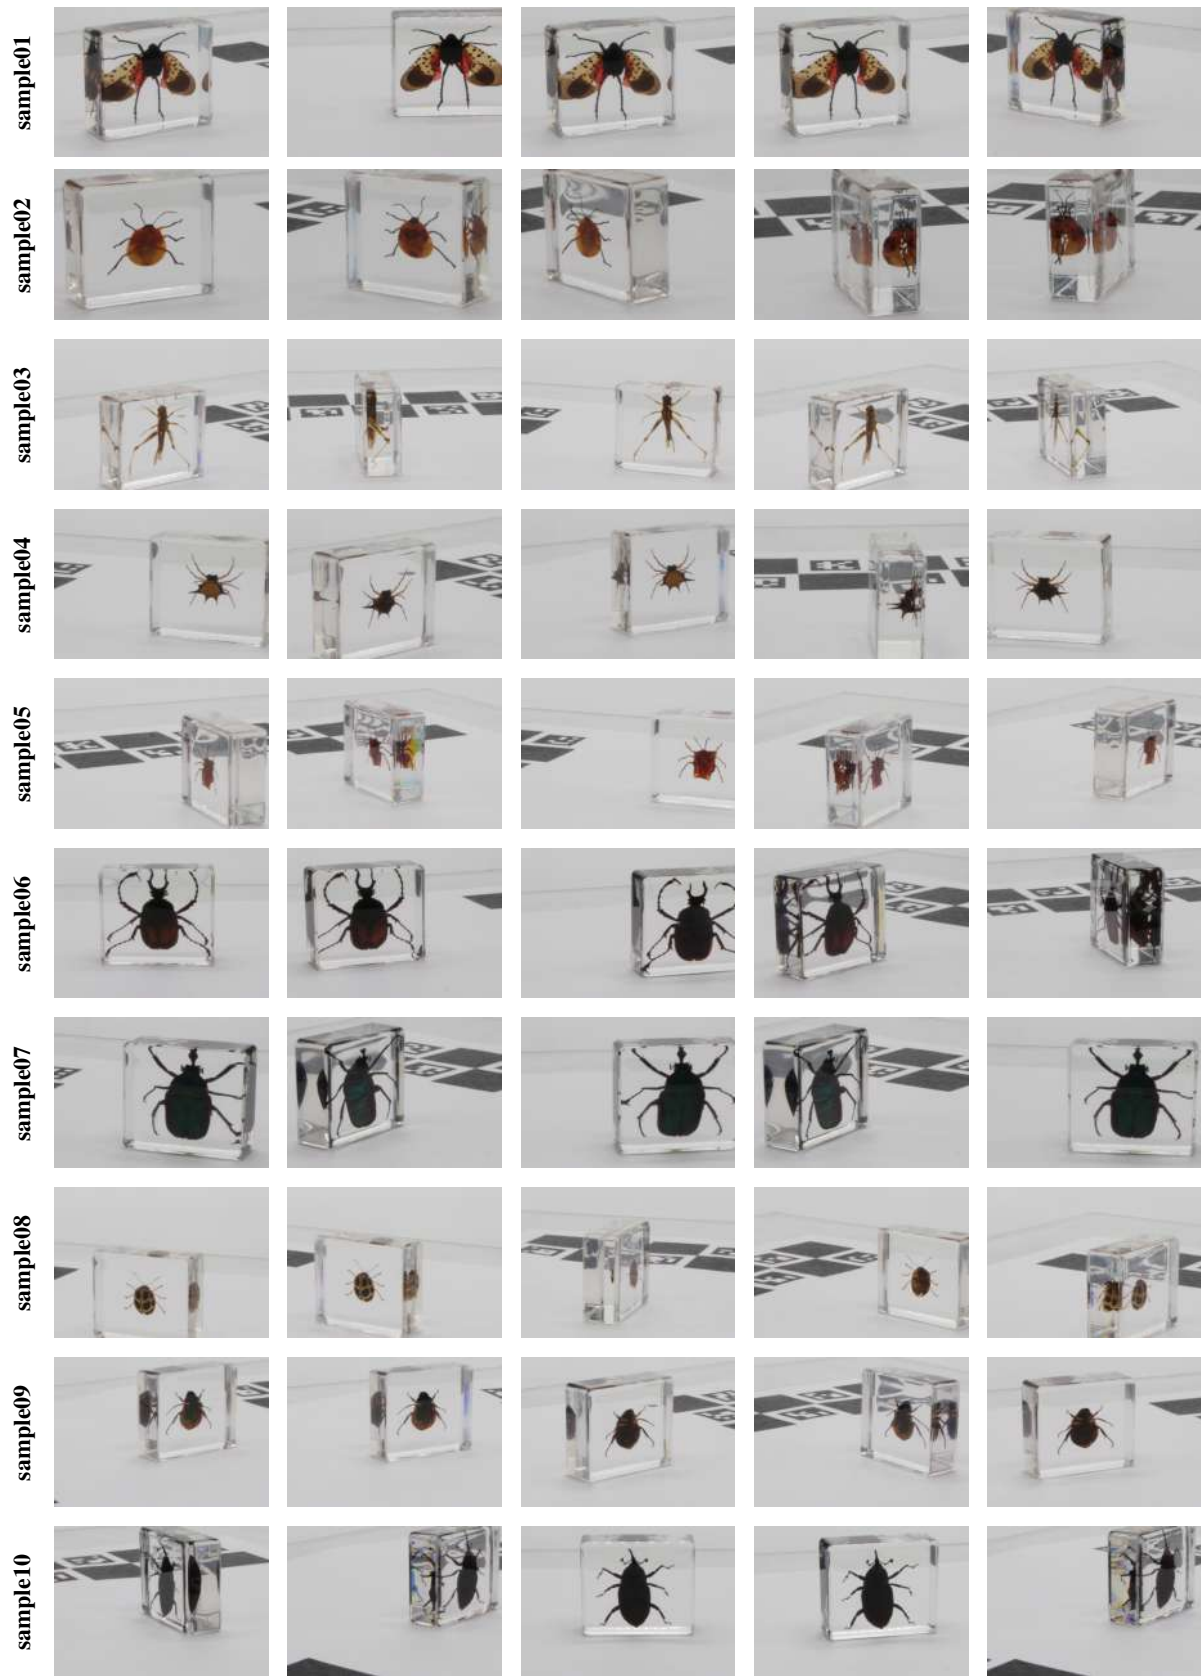

Figure 6. Examples of real dataset

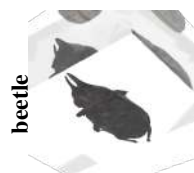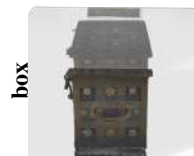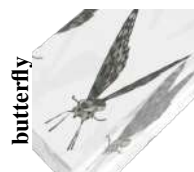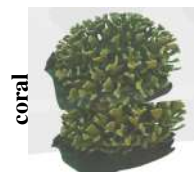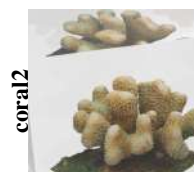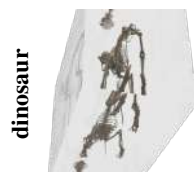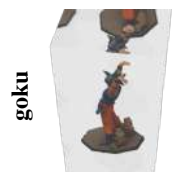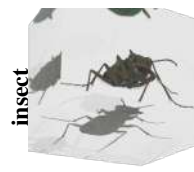

GT view

w/o box

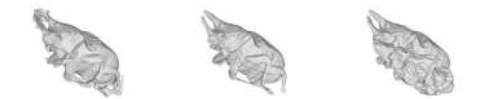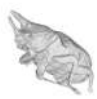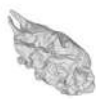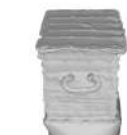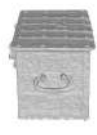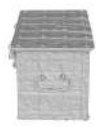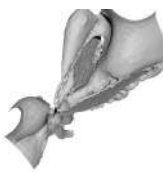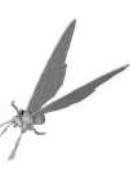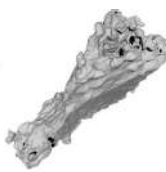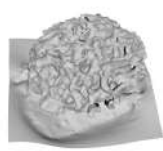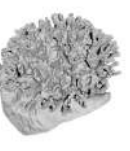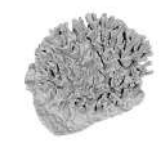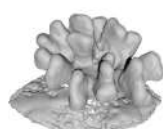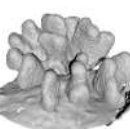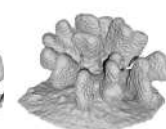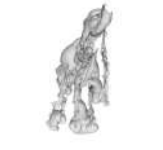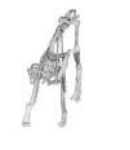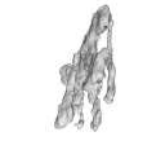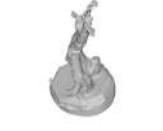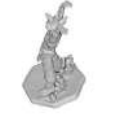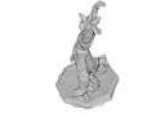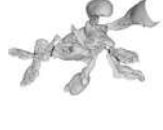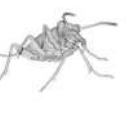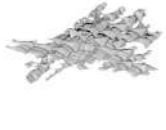

COLMAP

IDR

NeuS

w/box

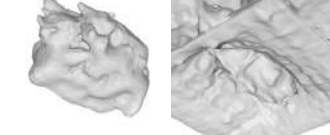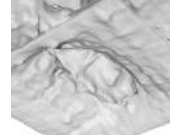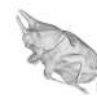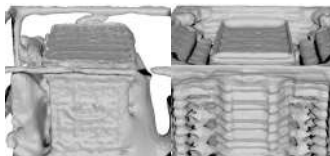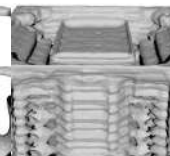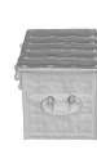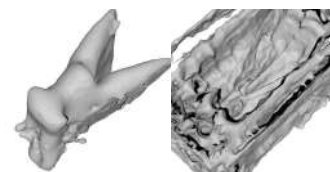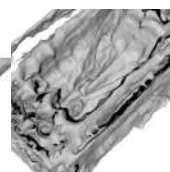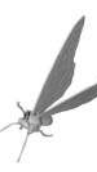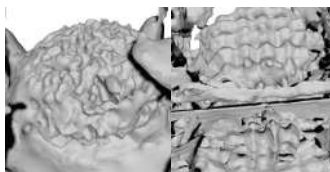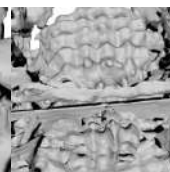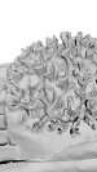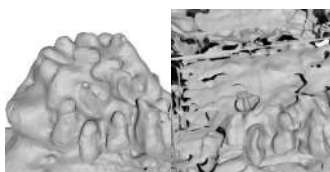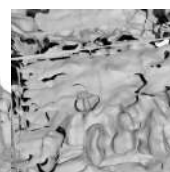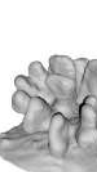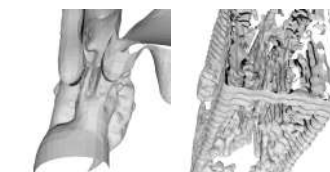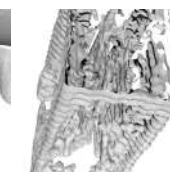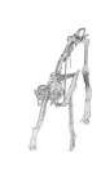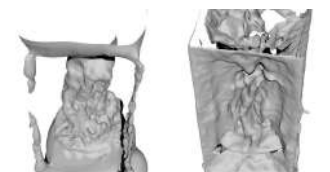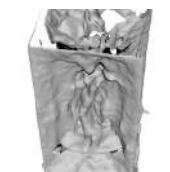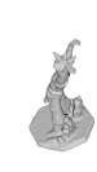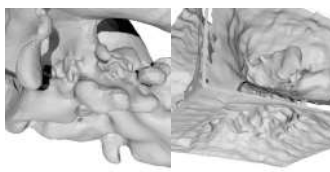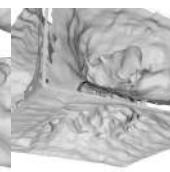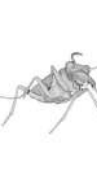

COLMAP

NeuS

Ours



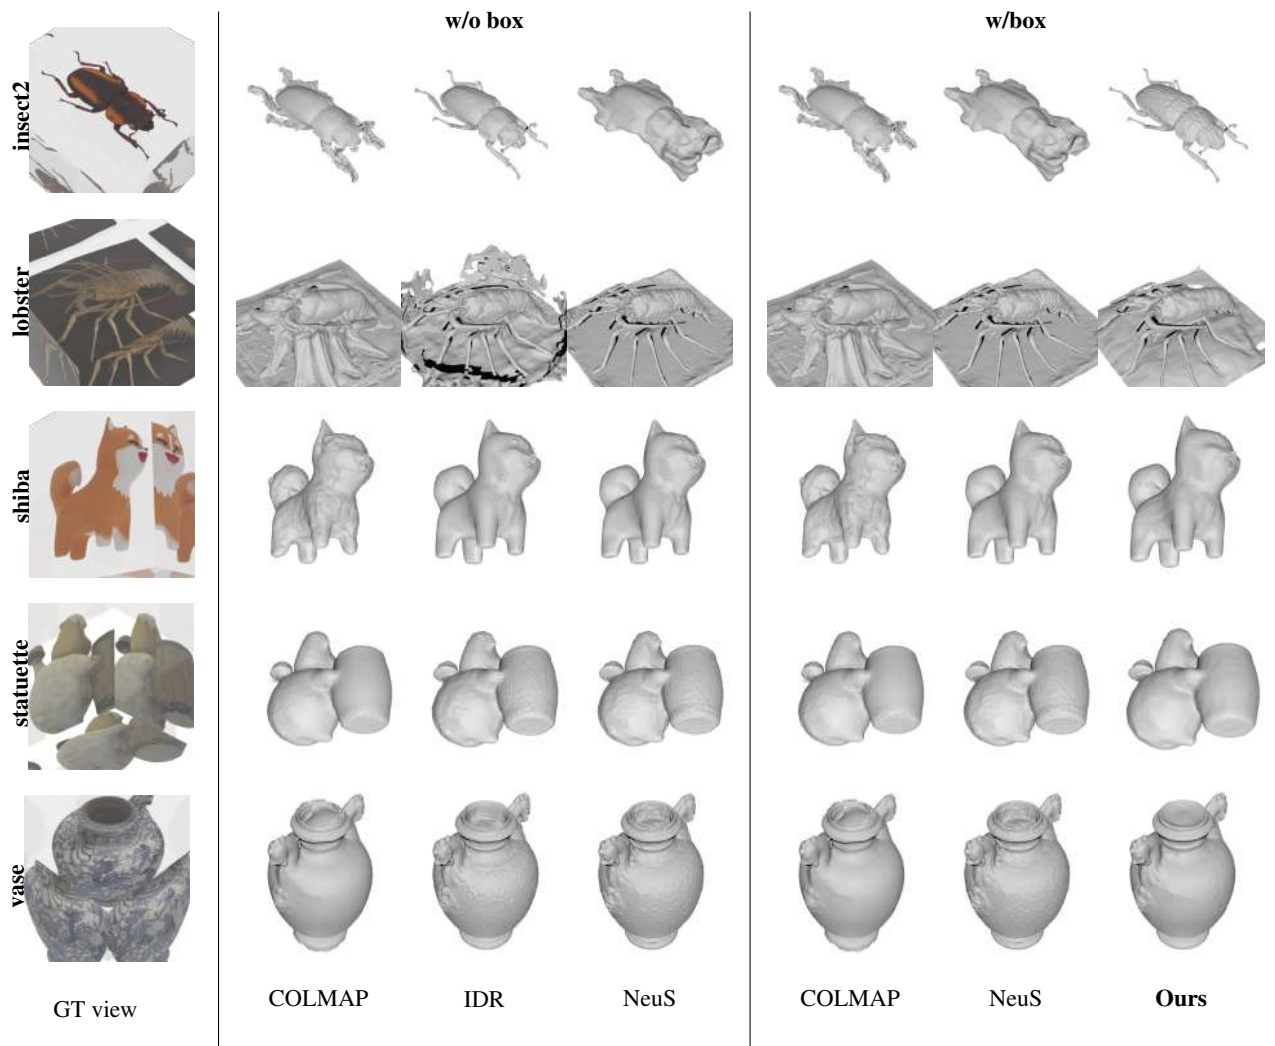

Figure 7. Qualitative comparison on synthetic dataset.

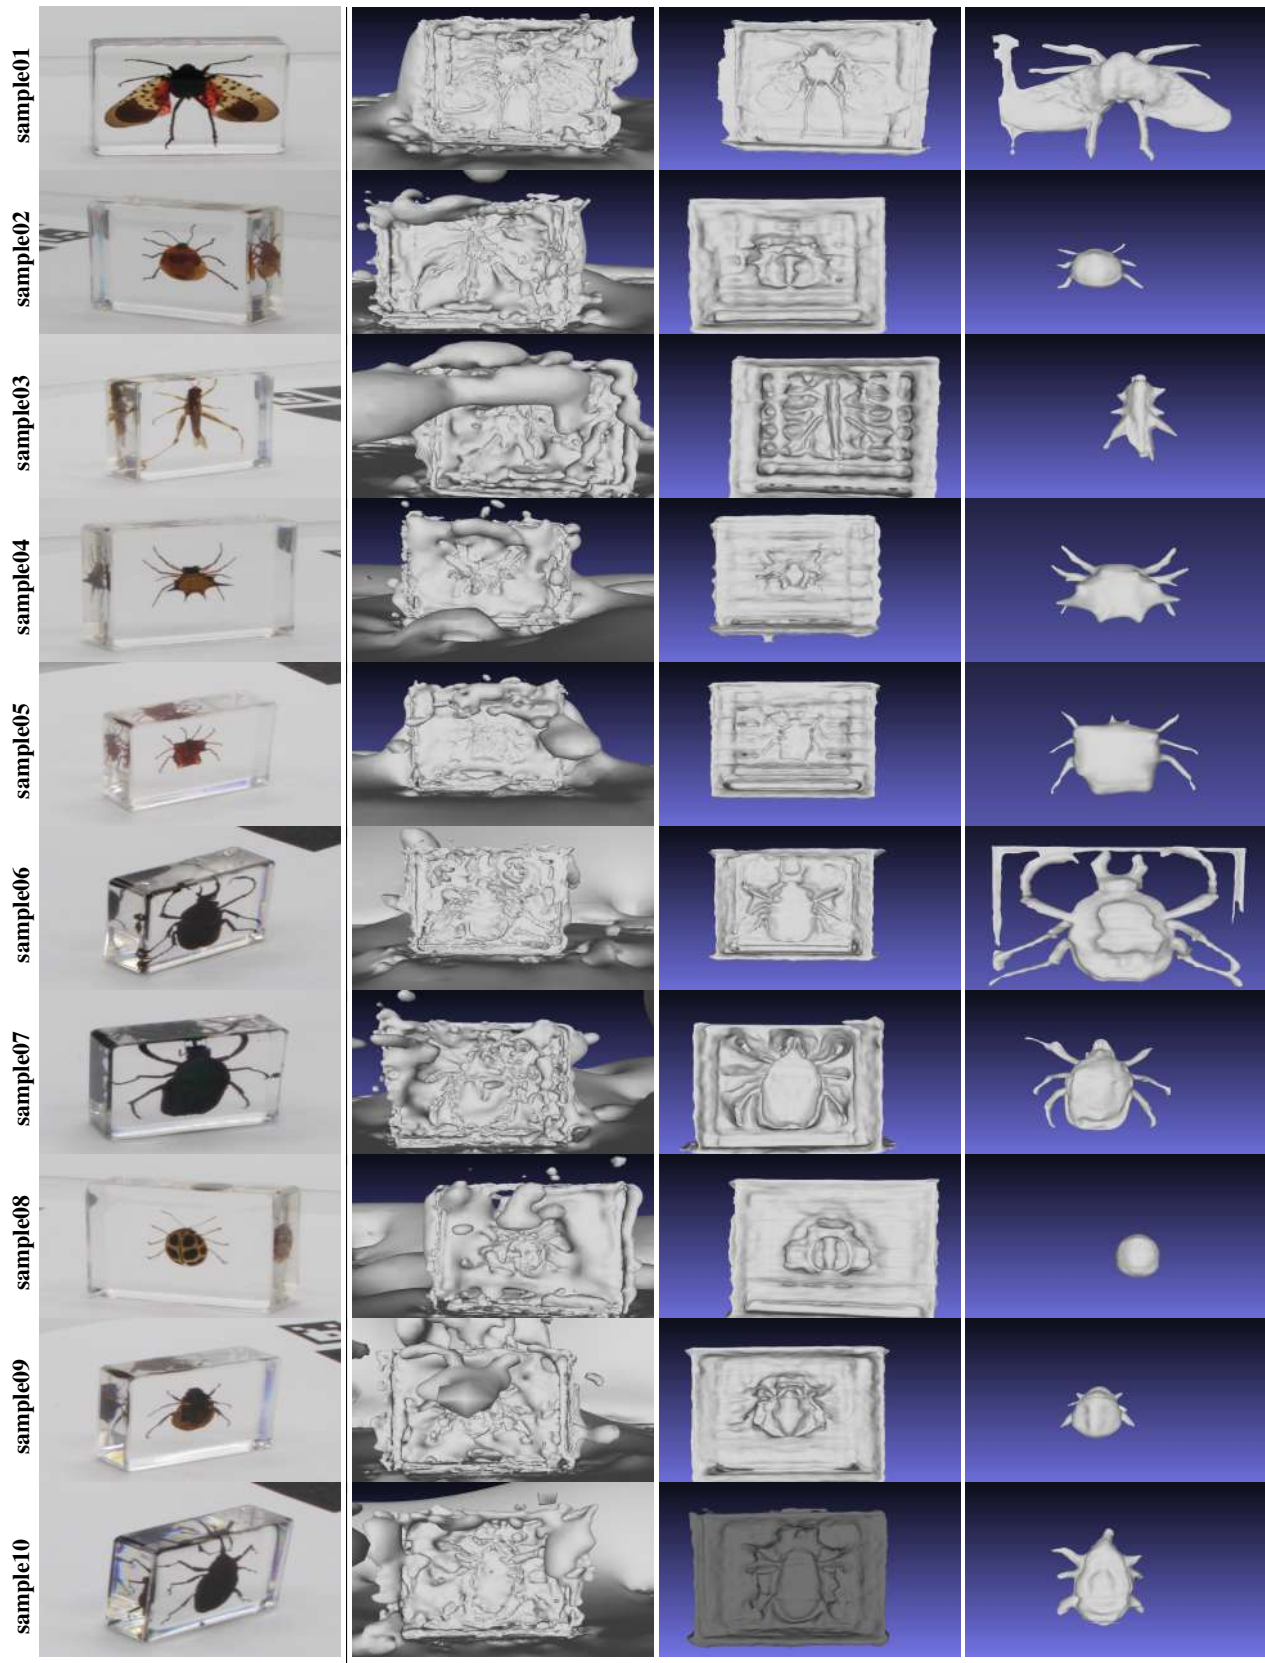

Reference

COLMAP

NeuS

Ours

Figure 8. Qualitative comparison on real dataset.
